# Supplementary material for: Systems biological assessment of the temporal dynamics of immunity to a viral infection in the first weeks and months of life
Source: PubMed Central journal article supplement — medRxiv. 2023 Jan 31:2023.01.28.23285133. Preprint. [Version 1] doi: 10.1101/2023.01.28.23285133 (PMC9915811; doi:10.1101/2023.01.28.23285133), 2023-01-31
Supplement: media-1.pdf [file media-1.pdf]

DataS1

# **Systems biological assessment of the temporal dynamics of immunity to a viral infection in the first weeks and months of life**

Florian Wimmers, Allison R. Burrell, Yupeng Feng, Hong Zheng, Prabhu S. Arunachalam, Mengyun Hu, Sara Spranger, Lindsay Nyhoff, Devyani Joshi, Meera Trisal, Mayanka Awasthi, Lorenza Bellusci, Usama Ashraf, Sangeeta Kowli, Katherine C. Konvinse, Emily Yang, Michael Blanco, Kathryn Pellegrini, Gregory Tharp, Thomas Hagan, R. Sharon Chinthrajah, Alba Grifoni, Alessandro Sette, Kari C. Nadeau, David B. Haslam, Steven E. Bosinger, Jens Wrammert, Holden T. Maecker, Paul J. Utz, Taia T. Wang, Surender Khurana, Purvesh Khatri, Mary A. Staat, Bali Pulendran

**Infant Demographics Table**

|                                                       | Controls (n = 27)      | Cases (n = 54)                    |
|-------------------------------------------------------|------------------------|-----------------------------------|
| Female                                                | 11                     | 24                                |
| Male                                                  | 16                     | 30                                |
|                                                       |                        |                                   |
| Hispanic                                              | 3                      | 3                                 |
| Not Hispanic                                          | 24                     | 51                                |
|                                                       |                        |                                   |
| White                                                 | 19                     | 42                                |
| Black/African American                                | 4                      | 8                                 |
| White, Black/African American                         | 4                      | 2                                 |
| White, Other                                          | 0                      | 1                                 |
| American Indian/Native Alaskan                        | 0                      | 1                                 |
|                                                       |                        |                                   |
| Pre-Omicron                                           | NA                     | 32                                |
| Omicron                                               | NA                     | 22                                |
|                                                       |                        |                                   |
| Age in Months (Mean)                                  | 14 (Age at specimen)   | 12 (Age at first positive swab)   |
| Age in Months (Median)                                | 12 (Age at specimen)   | 9 (Age at first positive swab)    |
| Age in Months (Range)                                 | 5-39 (Age at specimen) | 1-47 (Age at first positive swab) |
|                                                       |                        |                                   |
| Symptomatic Around First Positive Swab (Any Symptom)  | NA                     | 50                                |
| Asymptomatic Around First Positive Swab (Any Symptom) | NA                     | 4                                 |
| If Symptomatic – Was Cough/Fever Present?             | NA                     | 41 of 50                          |

**Adult Demographics Table**

|                           | Controls (n = 10)                    | Cases (n = 48)            |
|---------------------------|--------------------------------------|---------------------------|
| Female                    | 5                                    | 25                        |
| Male                      | 5                                    | 23                        |
|                           |                                      |                           |
| Hispanic                  | 1                                    | 1                         |
| Not Hispanic              | 7                                    | 35                        |
| No data available         | 2                                    | 12                        |
|                           |                                      |                           |
| White                     | 8                                    | 14                        |
| Black/African American    | 0                                    | 25                        |
| Other                     | 2                                    | 0                         |
| No data available         | 0                                    | 9                         |
|                           |                                      |                           |
| Pre-Omicron               | NA                                   | 48                        |
| Omicron                   | NA                                   | 0                         |
|                           |                                      |                           |
| Age in Years (Mean)       | 52 (Age at first positive swab)      | 57 (Age at specimen)      |
| Age in Years (Median)     | 53 (Age at first positive swab)      | 59 (Age at specimen)      |
| Age in Years (Range)      | 25 – 90 (Age at first positive swab) | 24 – 85 (Age at specimen) |
|                           |                                      |                           |
| Mild and moderate disease | NA                                   | 19                        |
| Severe disease            | NA                                   | 20                        |
| ICU                       | NA                                   | 9                         |
