# Supplementary material for: Systems biological assessment of the temporal dynamics of immunity to a viral infection in the first weeks and months of life
Source: PubMed Central journal article supplement — medRxiv. 2023 Jan 31:2023.01.28.23285133. Preprint. [Version 1] doi: 10.1101/2023.01.28.23285133 (PMC9915811; doi:10.1101/2023.01.28.23285133), 2023-01-31
Supplement: media-2.pdf [file media-2.pdf]

**DataS3**

**Systems biological assessment of the temporal dynamics of immunity to a viral infection in the first weeks and months of life**

Florian Wimmers, Allison R. Burrell, Yupeng Feng, Hong Zheng, Prabhu S. Arunachalam, Mengyun Hu, Sara Spranger, Lindsay Nyhoff, Devyani Joshi, Meera Trisal, Mayanka Awasthi, Lorenza Bellusci, Usama Ashraf, Sangeeta Kowli, Katherine C. Konvinse, Emily Yang, Michael Blanco, Kathryn Pellegrini, Gregory Tharp, Thomas Hagan, R. Sharon Chinthrajah, Alba Grifoni, Alessandro Sette, Kari C. Nadeau, David B. Haslam, Steven E. Bosinger, Jens Wrammert, Holden T. Maecker, Paul J. Utz, Taia T. Wang, Surender Khurana, Purvesh Khatri, Mary A. Staat, Bali Pulendran

## CyTOF antibodies

| Metal label | Target     | Source      | Clone      | Catalog# | Lot #       |
|-------------|------------|-------------|------------|----------|-------------|
| 89Y         | CD66b      | BioLegend   | G10F5      | 305102   | B289360     |
| 102-110Pd   | barcodes   | Fluidigm    |            | 201060   |             |
| 113In       | CD57       | BioLegend   | HNK-1      | 359602   | B256178     |
| 140Ce       | Beads      | Fluidigm    |            | 201078   | 2108040-25  |
| 141Pr       | HLA-DR     | BioLegend   | L243       | 307651   | B293412     |
| 142Nd       | CD19       | Fluidigm    | HIB19      | 3142001B | 2110583-20  |
| 143Nd       | CD127      | Fluidigm    | A019D5     | 3143012B | 2109346-24  |
| 144Nd       | IL4        | Fluidigm    | MP4-25D2   | 3144010B | 1641910     |
| 145Nd       | CD4        | Fluidigm    | RPA-T4     | 3145001B | 2109320-22  |
| 146Nd       | IgD        | Fluidigm    | IA6-2      | 3146005B | 2112420-15  |
| 147Sm       | CD20       | Fluidigm    | 2H7        | 3147001B | 2108087-31  |
| 148Nd       | CD34       | Fluidigm    | 581        | 3148001B | 3361909     |
| 149Sm       | STAT6      | Fluidigm    | 18/P-Stat6 | 3149004A | 2631806     |
| 150Nd       | pSTAT5     | Fluidigm    | 47         | 3150005A | 2103186-01  |
| 151Eu       | CD123      | Fluidigm    | 6H6        | 3151001B | 2112140-01  |
| 152Sm       | CLEC9A     | BioLegend   | 8F9        | 353802   | B285751     |
| 153Eu       | pSTAT1     | Fluidigm    | 4a         | 3153005A | 0572002     |
| 154Sm       | H3K27ac    | ActiveMotif | MABI0309   | MABI0309 | 17014       |
| 155Gd       | CD27       | Fluidigm    | L128       | 3155001B | 3331901     |
| 156Gd       | CD45       | Fluidigm    | HI30       | 3156010B | 0652006     |
| 157Gd       | CD25       | BioLegend   | M-A251     | 356102   | B332599     |
| 158Gd       | pSTAT3     | HIMC        | 4/P-Stat3  | 3158005A | 0132015     |
| 159Tb       | CD11c      | Fluidigm    | Bu15       | 3159001B | 0622021     |
| 160Gd       | CD14       | Fluidigm    | M5E2       | 3160001B | 2102949-16  |
| 161Dy       | Ki-67      | Fluidigm    | B56        | 3161007B | 1262010     |
| 162Dy       | CD1c       | BioLegend   | L161       | 331502   | B341969     |
| 163Dy       | TCRg/d     | BioLegend   | B1         | 331202   | B336422     |
| 164Dy       | Arginase-1 | Fluidigm    | 658922     | 3164012B | 2191531     |
| 165Ho       | pCREB      | Fluidigm    | 87G3       | 3165009A | 1812007     |
| 166Er       | CD16       | BioLegend   | B73.1      | 360702   | B243320     |
| 167Er       | CD38       | Fluidigm    | HIT2       | 3167001B | 0902009     |
| 168Er       | CD8        | Fluidigm    | SK1        | 3168002B | 2103185-01  |
| 169Tm       | CD45RA     | Fluidigm    | HI100      | 3169008B | 2109314-21  |
| 170Er       | CD3        | Fluidigm    | UCHT1      | 3170001B | 1691904     |
| 171Yb       | Granzyme B | Fluidigm    | GB11       | 3171002B | 2111006-23  |
| 172Yb       | CD15       | Fluidigm    | W6D3       | 3172021B | 2103359-16  |
| 173Yb       | Perforin   | abcam       | B-D48      | ab47225  | GR3362878-9 |
| 174Yb       | IFNg       | BioLegend   | 4S.B3      | 502502   | B259482     |
| 175Lu       | pS6        | Fluidigm    | N7-548     | 3175009A | 3451912     |
| 176Yb       | CD56       | Fluidigm    | NCAM16.2   | 3176008B | 2151801     |
| 191Ir       | DNA1       | Fluidigm    |            | 201192A  | P19K2303    |
| 193Ir       | DNA2       | Fluidigm    |            | 201192A  | P19K2303    |
| 209Bi       | PD-L1      | Fluidigm    | MIH1       | 3209014B | 2102823-01  |

### Antibodies for T cell ICS assay

| Fluorochrome | Antigen | Vendor         | Catalog#   | Clone     | Reaction    | Volume per reaction (μl) |
|--------------|---------|----------------|------------|-----------|-------------|--------------------------|
| FITC         | IL-2    | Biolegend      | 500304     | MQ1-17H12 | ICS         | 2                        |
| PerCP-eF710  | CXCR5   | Invitrogen     | 46-9185-42 | MU5UBEE   | Stimulation | 2.5                      |
| PE           | IL-4    | BioLegend      | 500810     | MP4-25D2  | ICS         | 1                        |
| PE-CF594     | CD45RA  | BD Biosciences | 565419     | 5H9       | Surface     | 2                        |
| PE-Cy7       | TNF- α  | E-Bioscience   | 25-7349-82 | Mab11     | ICS         | 0.3                      |
| BV421        | CD40L   | Biolegend      | 310824     | 24-31     | ICS         | 2                        |
| BV506        | TCR-γδ  | Biolegend      | 331220     | B1.1      | Surface     | 2.5                      |
| BV605        | CD4     | Biolegend      | 317438     | OKT4      | Surface     | 1.5                      |
| BV650        | CD3     | BD Biosciences | 563916     | SP34-2    | Surface     | 2.5                      |
| BV711        | CCR7    | Biolegend      | 353228     | G043H7    | Surface     | 2                        |
| BV785        | CD127   | Biolegend      | 351330     | A019D5    | Surface     | 2.5                      |
| APC          | IL-21   | BioLegend      | 513008     | 3A3-N2    | ICS         | 2.5                      |
| A700         | IFN-γ   | Biolegend      | 502520     | 4S.B3     | ICS         | 1                        |
| APC-Cy7      | CD25    | Biolegend      | 302614     | BC96      | Surface     | 2                        |
| BUV395       | CXCR3   | BD Biosciences | 565223     | 1C6/CXCR3 | Stimulation | 2.5                      |
| BUV563       | CD8     | BD Biosciences | 612914     | RPA-T8    | Surface     | 2                        |
| BUV737       | CCR6    | BD Biosciences | 612780     | 11A9      | Surface     | 2                        |
| BUV805       | CD69    | BD Biosciences | 748763     | FN50      | Surface     | 2                        |

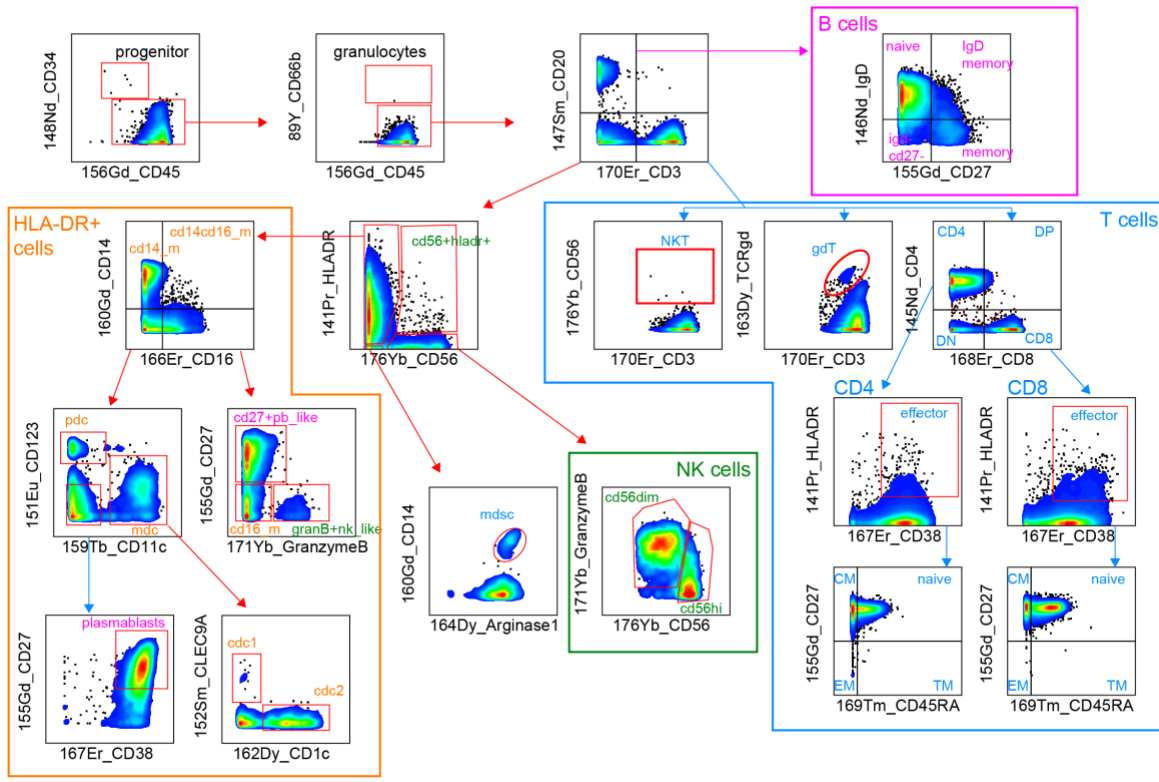

**CytoF Gating Scheme**
