# Supplementary material for: Systems biological assessment of the temporal dynamics of immunity to a viral infection in the first weeks and months of life
Source: PubMed Central journal article supplement — medRxiv. 2023 Jan 31:2023.01.28.23285133. Preprint. [Version 1] doi: 10.1101/2023.01.28.23285133 (PMC9915811; doi:10.1101/2023.01.28.23285133), 2023-01-31
Supplement: media-3.pdf [file media-3.pdf]

**DataS2**

**Systems biological assessment of the temporal dynamics of immunity to a viral infection in the first weeks and months of life**

Florian Wimmers, Allison R. Burrell, Yupeng Feng, Hong Zheng, Prabhu S. Arunachalam, Mengyun Hu, Sara Spranger, Lindsay Nyhoff, Devyani Joshi, Meera Trisal, Mayanka Awasthi, Lorenza Bellusci, Usama Ashraf, Sangeeta Kowli, Katherine C. Konvinse, Emily Yang, Michael Blanco, Kathryn Pellegrini, Gregory Tharp, Thomas Hagan, R. Sharon Chinthrajah, Alba Grifoni, Alessandro Sette, Kari C. Nadeau, David B. Haslam, Steven E. Bosinger, Jens Wrammert, Holden T. Maecker, Paul J. Utz, Taia T. Wang, Surender Khurana, Purvesh Khatri, Mary A. Staat, Bali Pulendran

## Antigens auto-antibody panel

| Antigen                     | Type                       | Vendor       | Catalogue No |
|-----------------------------|----------------------------|--------------|--------------|
| Bare Bead                   | Control                    |              |              |
| Human IgG from serum        | Control                    | Sigma        | I4506        |
| Anti-Human IgG Fc specific  | Control                    | Jackson      | 109-005-008  |
| Anti-Human IgG H+L          | Control                    | Jackson      | 109-005-003  |
| Anti-Human IgG Fab specific | Control                    | Jackson      | 109-005-006  |
| RPP14 (Th/To)               | Scleroderma                | Origene      | TP760291     |
| RPP25 (Th/To)               | Scleroderma                | Origene      | TP303538     |
| CENP A                      | Scleroderma                | Diarect      | A16901       |
| CENP B                      | Scleroderma                | Diarect      | A12501       |
| Scl-70, full-length         | Scleroderma                | Diarect      | A12401       |
| Scl-70, truncated           | Scleroderma                | Diarect      | A14501       |
| POLR3H                      | Scleroderma                | Origene      | TP310633     |
| Fibrillarin                 | Scleroderma                | Prospec      | ENZ-566      |
| U11/U12                     | Scleroderma                | Origene      | TP303746     |
| PM/ScI 100                  | Myositis/Overlap Syndromes | Diarect      | A16001       |
| MDA5                        | Myositis/Overlap Syndromes | Diarect      | A30001       |
| Troponin I                  | Myositis/Overlap Syndromes | Prospec      | PRO-1269     |
| MYH6                        | Myositis/Overlap Syndromes | Origene      | TP313673     |
| MI-2                        | Myositis/Overlap Syndromes | Diarect      | A18101       |
| EJ                          | Myositis/Overlap Syndromes | Diarect      | A11101       |
| JO1                         | Myositis/Overlap Syndromes | Diarect      | A12901       |
| PL-7                        | Myositis/Overlap Syndromes | Diarect      | A15601       |
| PL-12                       | Myositis/Overlap Syndromes | Diarect      | A15701       |
| SRP54                       | Myositis/Overlap Syndromes | Diarect      | A18401       |
| Ro52                        | SLE/Sjogren's              | Diarect      | A12701       |
| Ro60 (bovine)               | SLE/Sjogren's              | Diarect      | A15501       |
| Ro60                        | SLE/Sjogren's              | Diarect      | A17401       |
| La/SSB                      | SLE/Sjogren's              | Diarect      | A12801       |
| Sm/RNP                      | SLE/Sjogren's              | Immunovision | SRC-3000     |
| Smith                       | SLE/Sjogren's              | Immunovision | SMA-3000     |
| U1-snRNP A                  | SLE/Sjogren's              | Diarect      | A13101       |

|                       |                               |              |                    |
|-----------------------|-------------------------------|--------------|--------------------|
| U1-snRNP C            | SLE/Sjogren's                 | Diarect      | A13201             |
| PCNA                  | SLE/Sjogren's                 | Diarect      | A15401             |
| Ribo P0               | SLE/Sjogren's                 | Diarect      | A14101             |
| Ribo P2               | SLE/Sjogren's                 | Diarect      | A14301             |
| PDH                   | GI/Endocrine                  | Sigma        | P7032              |
| PDC-E2                | GI/Endocrine                  | Diarect      | A17901             |
| TPO                   | GI/Endocrine                  | Diarect      | A12101             |
| TG                    | GI/Endocrine                  | Diarect      | A12201             |
| Intrinsic Factor      | GI/Endocrine                  | Diarect      | A16701             |
| LKM1                  | GI/Endocrine                  | Diarect      | A13501             |
| Ku, p70/80            | Nucleosomes                   | Diarect      | A17301             |
| Nucleolin             | Nucleosomes                   | Diarect      | A19701             |
| Whole Histone         | Nucleosomes                   | Immunovision | HIS-1000           |
| Histone 1             | Nucleosomes                   | Immunovision | HIS-1001           |
| Histone 2A and 4      | Nucleosomes                   | Immunovision | HIS-1002           |
| Histone 2B            | Nucleosomes                   | Immunovision | HIS-1003           |
| Histone 3             | Nucleosomes                   | Immunovision | HIS-1004           |
| C1q                   | Tissue Inflammation           | Biodesign    | A90150H            |
| Beta 2 Glycoprotein 1 | Tissue Inflammation           | Diarect      | A14901             |
| Myeloperoxidase       | Tissue Inflammation           | Diarect      | A18501             |
| Proteinase 3          | Tissue Inflammation           | Diarect      | A18601             |
| BPI                   | Tissue Inflammation           | Arotec       | ATB01-02           |
| GBM dissociated       | Tissue Inflammation           | Diarect      | A16801             |
| HSP 70                | Tissue Inflammation           | Stressgen    | NSP-555            |
| HSP 90                | Tissue Inflammation           | Stressgen    | SPP-770            |
| PM/Sci-75             | Myositis/Overlap<br>Syndromes | Diarect      | A17001             |
| Ribo P1               | SLE/Sjogren's                 | Diarect      | A14201             |
| IFNalpha1             | Interferon                    | Prospec      | CYT-291            |
| IFNalpha2             | Interferon                    | R&D          | 11101-2            |
| IFNalpha6             | Interferon                    | MyBioSource  | MBS1351081         |
| IFNalpha7             | Interferon                    | Prospec      | CYT-196            |
| IFNalpha8             | Interferon                    | Sino         | 10347-H08H         |
| IFNalpha10            | Interferon                    | Sino         | 10349-H08H         |
| IFNbeta               | Interferon                    | Peprotech    | 300-02BC           |
| IFNgamma              | Interferon                    | Peprotech    | 300-02             |
| IFNepsilon            | Interferon                    | R&D          | 9667-ME-<br>025/CF |
| IFNlambda1            | Interferon                    | Peprotech    | 300-02L            |
| IFNlambda2            | Interferon                    | Peprotech    | 300-02K            |

|                    |                |           |                |
|--------------------|----------------|-----------|----------------|
| IFNlambda3         | Interferon     | R&D       | 5259-IL-025/CF |
| IFNomega           | Interferon     | R&D       | 11395-1        |
| IL-1alpha          | Interleukin    | Prospec   | CYT-253        |
| IL-1beta           | Interleukin    | Peptotech | 200-01B        |
| IL-2               | Interleukin    | Peptotech | 200-02         |
| IL-4               | Interleukin    | Peptotech | 200-04         |
| IL-6               | Interleukin    | Peptotech | 200-06         |
| IL-7               | Interleukin    | Peptotech | 200-07         |
| IL-10              | Interleukin    | Peptotech | 200-10         |
| IL-11              | Interleukin    | Prospec   | CYT-214        |
| IL-12p40           | Interleukin    | Sino      | 10052-H02H     |
| IL-12p70           | Interleukin    | Peptotech | 200-12         |
| IL-13              | Interleukin    | Peptotech | 200-13         |
| IL-15              | Interleukin    | Peptotech | 200-15         |
| IL-17A             | Interleukin    | Peptotech | 200-17         |
| IL-17F             | Interleukin    | Peptotech | 200-25         |
| IL-21              | Interleukin    | Peptotech | 200-21         |
| IL-22              | Interleukin    | Peptotech | 200-22         |
| IL-27              | Interleukin    | Prospec   | CYT-048        |
| IL-31              | Interleukin    | Prospec   | CYT-625        |
| IL-33              | Interleukin    | Peptotech | 200-33         |
| ACE2               | Other Cytokine | Sino      | 10108-H05H     |
| C3a                | Other Cytokine | R&D       | 3677-C3-025    |
| CD74               | Other Cytokine | Prospec   | PRO-1467       |
| CNTF               | Other Cytokine | Prospec   | CYT-272        |
| CRP                | Other Cytokine | Prospec   | PRO-335        |
| CT-2               | Other Cytokine | Prospec   | PRO-1578       |
| d-dimer            | Other Cytokine | LeeBio    | 200-13-0.1     |
| Eotaxin            | Other Cytokine | Peptotech | 300-21         |
| Eotaxin 2          | Other Cytokine | Peptotech | 300-33         |
| Fractalkine/CX3CL1 | Other Cytokine | Peptotech | 300-31         |
| GM-CSF             | Other Cytokine | Peptotech | 300-03         |
| HTRA1              | Other Cytokine | R&D       | 2916-SE-020    |
| IP-10/CXCL10       | Other Cytokine | Peptotech | 300-12         |
| LIF                | Other Cytokine | Peptotech | 300-05         |
| MCP-2/CCL8         | Other Cytokine | Peptotech | 300-15         |
| MIP-1alpha         | Other Cytokine | Peptotech | 300-08         |
| OSM                | Other Cytokine | Peptotech | 300-10         |

|               |                |           |         |
|---------------|----------------|-----------|---------|
| PDGFBB        | Other Cytokine | Peprotech | 100-14B |
| SDF-1a/CXCL12 | Other Cytokine | Peprotech | 300-28A |
| sRANK-ligand  | Other Cytokine | Peprotech | 310-01C |
| TIF1-gamma    | Other Cytokine | Diarect   | A11001  |
| TNFalpha      | Other Cytokine | Peprotech | 300-01A |
| TNFbeta       | Other Cytokine | Peprotech | 300-01B |
| VEGFB         | Other Cytokine | Peprotech | 100-20B |
